# Supplementary material
Source: PubMed Central journal article supplement (PMC2781424)
Supplement: supp_M109.041186_jbc.M109.041186-1.pdf [file supp_M109.041186_jbc.M109.041186-1.pdf]

## SUPPLEMENTARY FIGURES

**Suppl Fig. 1** – Subcellular localisation of endogenous Daxx and C/EBP $\beta$ . HepG2 cells were seeded on coverslips, fixed and stained with antibodies against Daxx and C/EBP $\beta$ . The cells were examined by confocal laser scanning microscopy.

**Suppl Fig. 2** – GST pull-down experiment. GST-Daxx1-751 and GST were immobilized on glutathione-sepharose and incubated with in vitro translated,  $^{35}$ S-methionine labelled C/EBP $\beta$ . Bound proteins as well as a sample of the input material (10 %) were analyzed by 10 % SDS-PAGE and analyzed by autoradiography. The left panel Coomassie blue staining of the GST-proteins used in the pull down experiments.

**Suppl Fig. 3** – GST pull-down experiment. QT6 cells were transfected with expression vectors for Flag-C/EBP $\beta$  (5  $\mu$ g) and Flag-SENPI (5  $\mu$ g), as indicated above the lanes. Cells were lysed after 24 hours and protein extracts were incubated with GST-Daxx1-571 and GST immobilized on glutathione-sepharose. Bound proteins as well as samples of the input material (10 %) were analyzed by 10 % SDS-PAGE and analyzed by western blotting with Flag antibodies. The left panel Coomassie blue staining of the GST-proteins used in the pull down experiments.

**Suppl Fig. 4** - Electrophoretic mobility shift assay (upper panel). QT6 cells were transfected with expression vectors for C/EBP $\beta$  (3  $\mu$ g) and HA-Daxx (5 and 10  $\mu$ g), as indicated at the top. Nuclear extracts prepared from the cells were then subjected to an electrophoretic mobility shift experiment with a radiolabeled oligonucleotide containing a consensus C/EBP binding site. Lane 1 shows the free oligonucleotide without added cell extract and lanes 2-5 show binding reaction with the respective extracts. Preparation of nuclear extract and binding reactions were carried out as described before (15). The amounts of C/EBP $\beta$  and Daxx present in the nuclear extract were analyzed by SDS-PAGE and western blotting (bottom panels).

**Suppl Fig. 5** - Hela cells were transfected with 1,3  $\mu$ g of expression vectors for GFP-Daxx (a-c) or GFP-Daxx and Flag-C/EBP $\beta$  (d-f). Endogenous PML was detected with a primary anti-PML antibody and a TRITC-coupled secondary antibody. The white arrows indicate co-localisation of GFP-Daxx with endogenous PML in PODs.

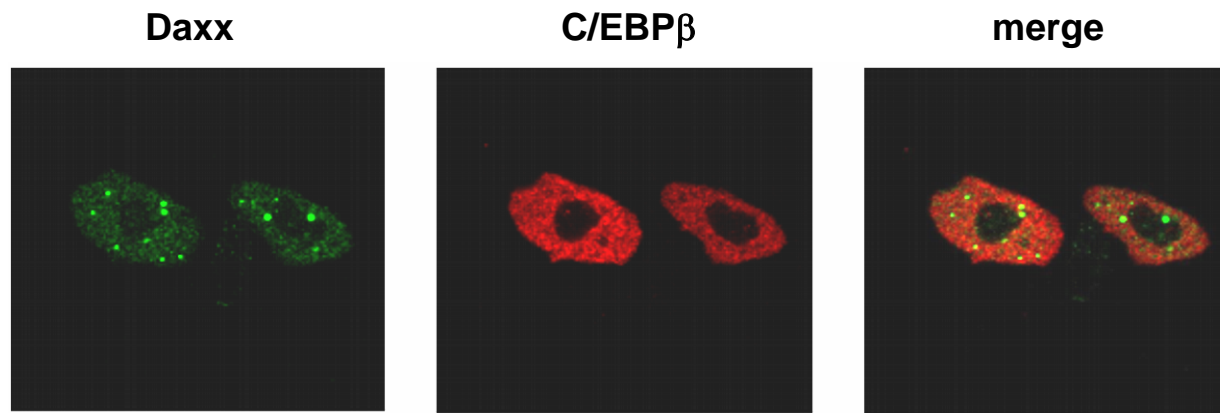

**Fig. S1**

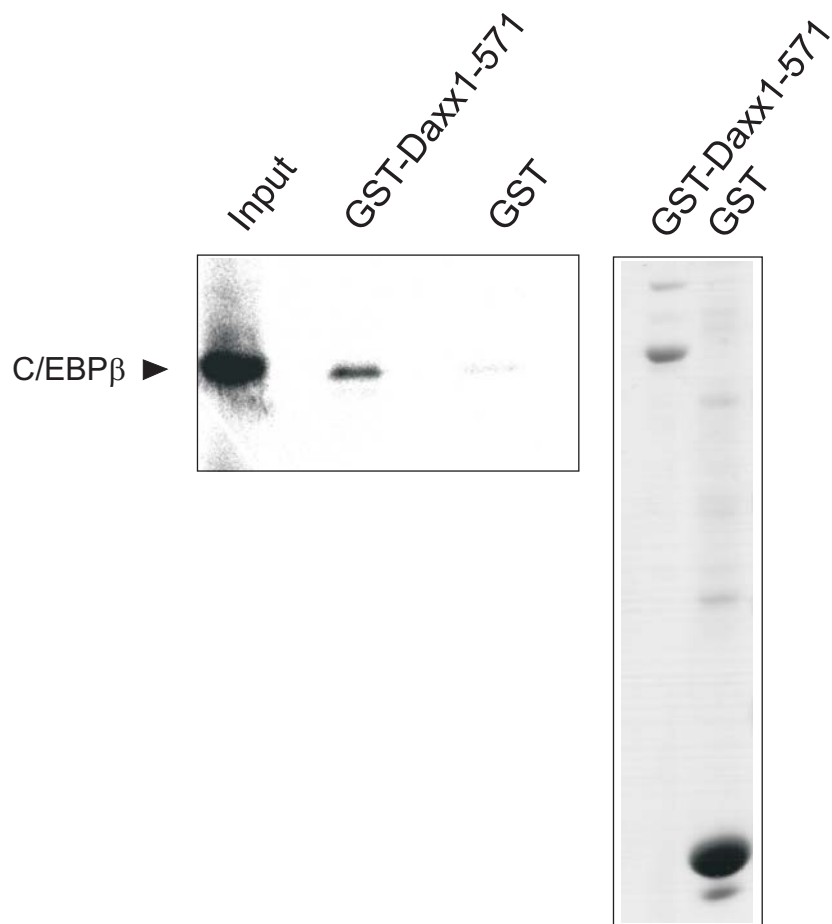

**Suppl. Fig 2**

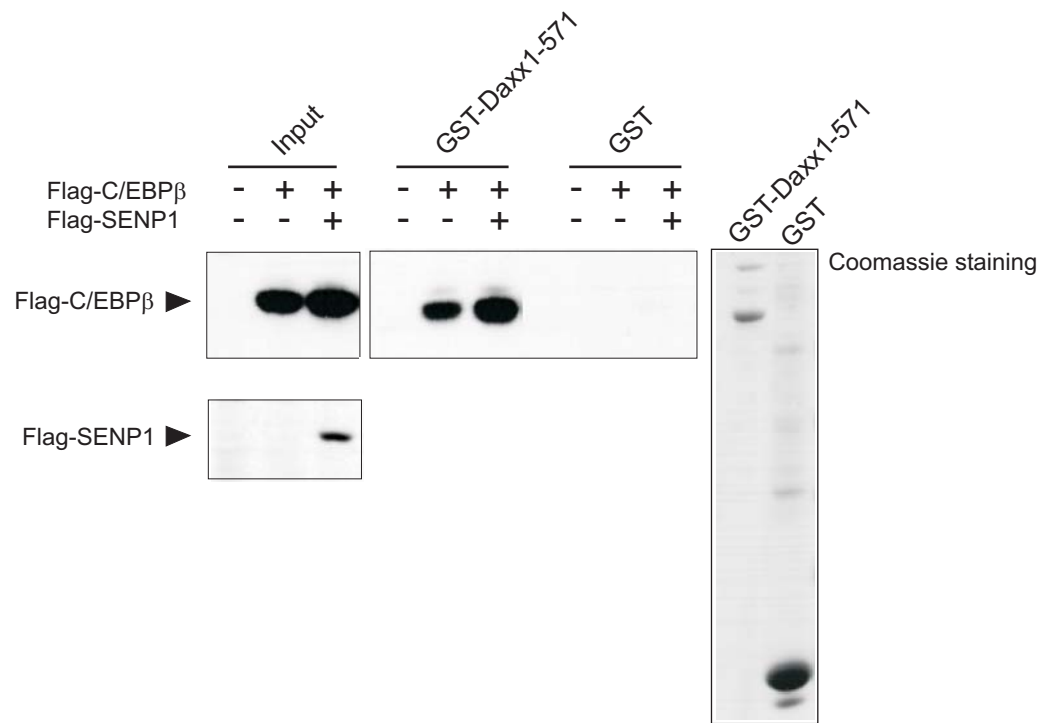

**Suppl. Fig 3**

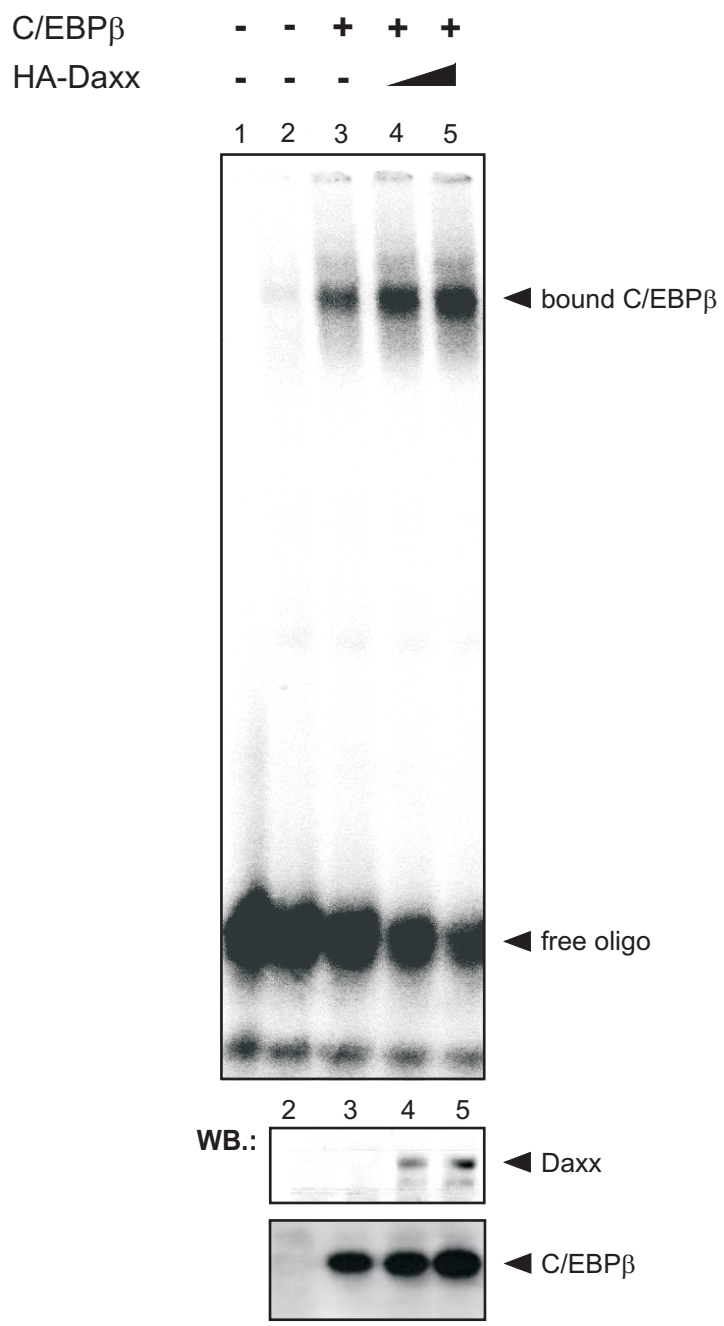

**Suppl. Fig 4**

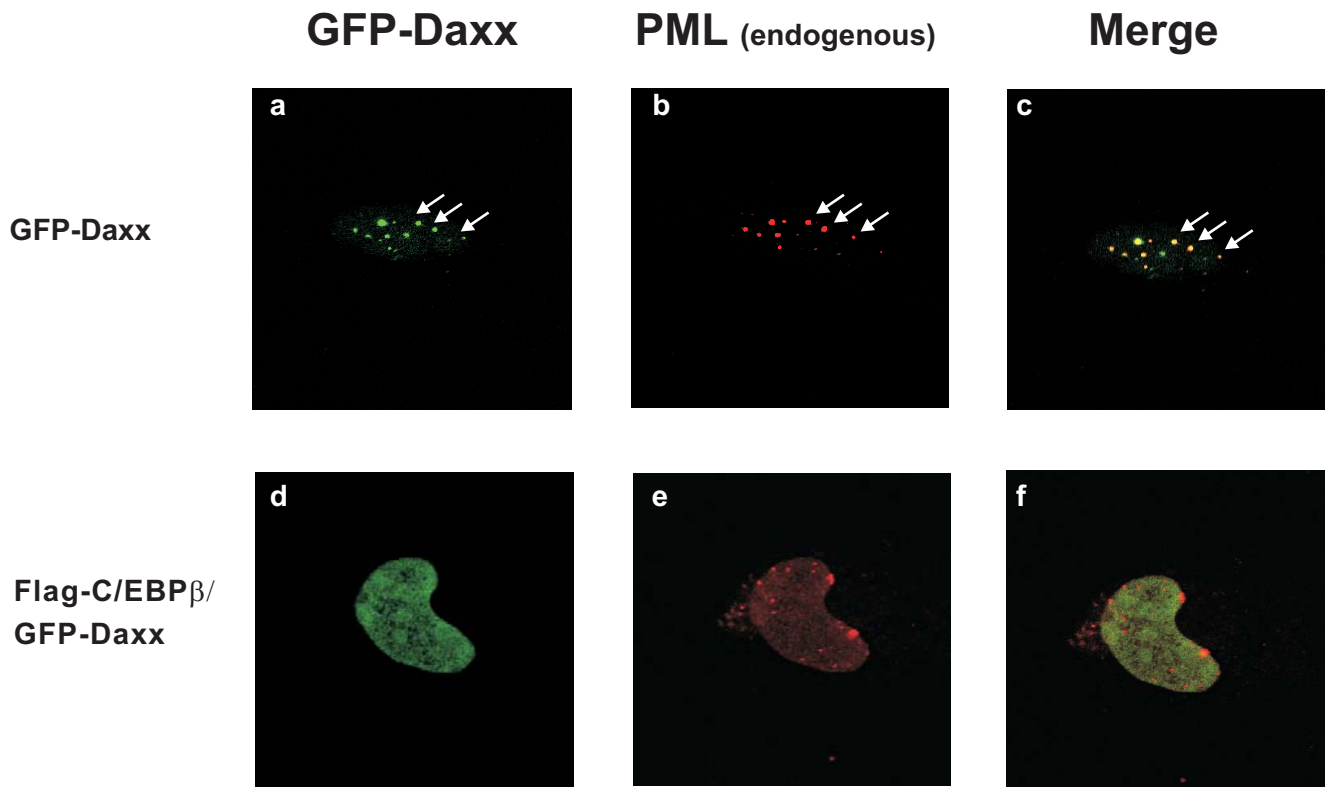

**Suppl. Fig 5**
